1 Article type

2 **Research paper**

3

4 Title

5 Investigating on relationship between effective quantum efficiency and  
6 irradiance

7 Zi-Piao Ye<sup>1</sup>, Shuang-Xi Zhou<sup>2</sup>, Xiao-Long Yang<sup>3</sup>, Hua-Jing Kang<sup>4</sup>, Piotr Robakowski<sup>5\*</sup>

8 <sup>1</sup>*Math & Physics College, Jinggangshan University, Ji'an 343009, P. R. of China;* <sup>2</sup> *Department of Biological*  
9 *Sciences, Macquarie University, NSW 2109, Australia;* <sup>3</sup> *Department of Environmental Science and Engineering,*  
10 *Fudan University, Shanghai, 200433, China;* <sup>4</sup> *Wenzhou Vocational College of Science & Technology, Wenzhou*  
11 *325006, P. R. of China;* *Department of Forestry, Poznan University of Life Sciences, Wojska Polskiego 71E St.,*  
12 *60–625 Poznan, Poland;*

13

14 Corresponding author(s)

15 Piotr Robakowski

16

17 *Department of Forestry, Poznan University of Life Sciences, Wojska Polskiego 71E St., 60–625*  
18 *Poznan, Poland*

19 E-mail: pierrot@up.poznan.pl

20

21

22

23

24

25

26

27

28

29

30

Submitted to *Journal of Experimental Botany*

# 31 Investigating on relationship between effective quantum efficiency and 32 irradiance\*

33 Zi-Piao Ye<sup>1</sup>, Shuang-Xi Zhou<sup>2\*</sup>, Xiao-Long Yang<sup>3</sup>, Hua-Jing Kang<sup>4</sup>, Piotr Robakowski<sup>5\*</sup>

34 <sup>1</sup>*Math & Physics College, Jinggangshan University, Ji'an 343009, P. R. of China;* <sup>2</sup> *Department of Biological*  
35 *Sciences, Macquarie University, NSW 2109, Australia;* <sup>3</sup> *Department of Environmental Science and Engineering,*  
36 *Fudan University, Shanghai, 200433, China;* <sup>4</sup> *Wenzhou Vocational College of Science & Technology, Wenzhou*  
37 *325006, P. R. of China;* <sup>5</sup> *Department of Forestry, Poznan University of Life Sciences, Wojska Polskiego 71E St.,*  
38 *60–625 Poznan, Poland*

39

40

41 **Highlight** A model of the relationship between effective quantum efficiency of PS II ( $\Phi_{\text{PSII}}$ ) and irradiance ( $I$ )  
42 has been developed. Using this new model it was found that  $\Phi_{\text{PSII}}$  decreased with increasing  $I$  due to the  
43 decrease in the effective absorption cross-section of photosynthetic pigments molecules.

44

45 **Abstract** Models describing the relationship between effective quantum efficiency of PS II ( $\Phi_{\text{PSII}}$ ) and irradiance  
46 ( $I$ ) are routinely used to determine how irradiance influences effective quantum efficiency and photosynthetic  
47 electron transport rate ( $ETR$ ). However, with no single model one can accurately describe the relationship  
48 between  $\Phi_{\text{PSII}}$  and  $I$ , and explain the interdependence between  $\Phi_{\text{PSII}}$  and biophysical properties of photosynthetic  
49 pigments, especially in plants growing under low level irradiances. Basing on the mechanistic model of  
50 photosynthetic electron transport rate we have developed the model of the relationship between  $\Phi_{\text{PSII}}$  and  $I$ . The  
51 new model reveals that  $\Phi_{\text{PSII}}$  increases with photochemistry ( $k_P$ ) and heat dissipation ( $k_D$ ). Furthermore, the  
52 values of key parameters calculated using the new model were compared with the values calculated with two  
53 other empirical models. The new model was perfectly fitted to the light-response curves of  $\Phi_{\text{PSII}}$ . The key  
54 calculated photosynthetic parameters: maximum  $\Phi_{\text{PSII}}$ , maximum  $ETR$  and their corresponding saturation  
55 irradiance were close to the measured values. In addition, our model associates  $\Phi_{\text{PSII}}$  with intrinsic features of  
56 photosynthetic pigments. We concluded that  $\Phi_{\text{PSII}}$  decreased with increasing  $I$  due to the decrease in the effective  
57 absorption cross-section of photosynthetic pigments molecules.

58

59 **Keywords:** Chlorophyll fluorescence, effective quantum efficiency, irradiance, photosynthetic electron  
60 transport rate, photosynthetic pigments, photosynthesis

61

62

---

\* These authors contributed equally to this work.

63 **Abbreviations**

64  $ETR$  Electron transport rate

65  $ETR_{\max}$  Maximum electron transport rate

66  $F$  Steady-state fluorescence

67  $F_m'$  Maximum fluorescence in the light

68  $F_v$  Variable fluorescence yield of the dark-adapted leaf

69  $g_i$  Degeneration of energy level of photosynthetic pigment molecules in the ground state  $i$

70  $g_k$  Degeneration of energy level of photosynthetic pigment molecules in the excited state  $k$

71  $I$  Irradiance

72  $NPQ$  Non-photochemical quenching

73  $N_0$  Total light-harvesting pigment molecules

74  $PAR_{\text{sat}}$  Saturation irradiance corresponding to  $ETR_{\max}$

75  $k_p$  Rate of photochemical reaction

76  $k_D$  Rate of non-radiative heat dissipation

77 PS II Photosystem II

78  $a_e$  Initial slope of light-response curve of electron transport rate

79  $\alpha'$  Fraction of light absorbed by PS II

80  $\beta'$  Leaf absorptance

81  $\xi_1$  Probability of photochemistry

82  $\xi_2$  Probability of non-radiative heat dissipation

83  $\xi_3$  Probability of fluorescence

84  $\sigma_{ik}$  Eigen-absorption cross-section of photosynthetic pigment from ground state  $i$  to excited state  $k$  due to

85 light illumination

86  $\sigma'_{ik}$  Effective optical absorption cross-section of photosynthetic pigment molecule from ground state  $i$  to

87 excited state  $k$  due to light illumination

88  $\varphi$  Exciton-use efficiency in PS II

89  $\tau$  Average lifetime of the photosynthetic pigment molecules in the lowest excited state

90  $\Phi_{\text{PSII}}$  Effective quantum efficiency of PS II

91

92

93

94

95

## 96 Introduction

97 Light reactions of photosynthesis have been characterized by means of using the measurements  
98 of chlorophyll fluorescence as a useful and informative indicator (Krause & Weis, 1984; van  
99 Kooten & Snel, 1990; Rascher *et al.*, 2000; van der Tol *et al.*, 2014; Kalaji *et al.*, 2016). The key  
100 photosynthetic parameters are: maximum quantum efficiency of photosystem II ( $F_v/F_m$ ), effective  
101 quantum efficiency of photosystem II ( $\Phi_{PSII}$ ), photosynthetic electron transport rate ( $ETR$ ) and  
102 other chlorophyll fluorescence parameters (e.g. non-photochemical quenching,  $NPQ$ , coefficient of  
103 photochemical quenching,  $qL$ ). Genty *et al.* (1989) proposed that  $\Phi_{PSII}$  at the steady state could be  
104 calculated from the ratio of the variable to maximum fluorescence in the light. It is a breakthrough  
105 concept of using fluorescence and irradiance ( $I$ ) or the flux of photosynthetically active radiation  
106 ( $PAR$ ) absorbed by leaf to estimate  $ETR$ , which is the most widely used to assess the efficiency of  
107 plants photochemistry in different environments (Genty *et al.*, 1989; Majláth *et al.*, 2016; Moin *et*  
108 *al.*, 2016).  $\Phi_{PSII}$  represents the proportion of photons of incident light that are actually used to drive  
109 photochemistry (Maxwell & Johnson, 2000).  $\Phi_{PSII}$  is directly associated with  $ETR$  ( $=\alpha' \times \beta$   
110  $\times \Phi_{PSII} \times I$ , where  $\alpha'$  is a distribution coefficient of absorption of the light energy by PS II and PS I,  
111  $\beta'$  is leaf absorptance,  $I$  is irradiance) (Krall & Edward, 1992). Under controlled conditions, this  
112 parameter linearly relates with quantum efficiency of  $CO_2$  assimilation (Genty *et al.*, 1989).  
113 However, in natural environment where stressors are likely to affect photosynthesis alternative  
114 processes to  $CO_2$  assimilation, such as photorespiration or Mehler reaction may cause discrepancy  
115 between  $\Phi_{PSII}$  and  $CO_2$  assimilation (Fryer *et al.*, 1998).

116 According to the definition of  $\Phi_{PSII}$  [ $\Phi_{PSII}=(F_m'-F)/F_m'$ , where  $F_m'$  is maximum fluorescence in  
117 the light,  $F$  is steady-state fluorescence], it is clear that  $\Phi_{PSII}$  is closely linked with the closure and  
118 opening of PS II in photosynthetic primary reactions as well as fluorescence emission of  
119 light-harvesting pigment molecules because chlorophyll fluorescence mainly come from these  
120 photosynthetic pigments (Baker, 2008). Photosynthesis research has long focused on  $\Phi_{PSII}$  and  
121  $ETR$  due to photosystem II (PS II) given its core role in photosynthesis, but also since PS II  
122 activity can be conveniently assayed via bio-optical techniques, e.g. chlorophyll fluorescence (e.g.  
123 Buckley & Farquhar, 2004; Robakowski, 2005; Baker, 2008; Suggett *et al.*, 2010; Pavlovič *et al.*,  
124 2011). Numerous studies have used these fluorescence techniques to determine  $\Phi_{PSII}$  and  $ETR$

125 (see the references above) and found  $\Phi_{\text{PSII}}$  to decrease nonlinearly with increasing irradiance  
126 (Robakowski, 2005; Pavlovič *et al.*, 2011; van der Tol *et al.*, 2014; Córdoba *et al.*, 2016).  
127 However, no single model is currently able to describe satisfactorily the relationship between  
128  $\Phi_{\text{PSII}}$  and *PAR*, and reveal the action of intrinsic characteristics of light-harvesting pigments in  
129  $\Phi_{\text{PSII}}$ .

130 In photosynthesis, antenna pigment molecules absorb light energy to change the state of the  
131 pigments from the ground state to the excited state. Then, the excitation energy is mainly used by  
132 three inter-competing paths, i.e. photochemistry, heat dissipation and chlorophyll fluorescence  
133 emission (Müller *et al.*, 2001; Oxborough, 2004; Baker, 2008). This competition among three  
134 de-excited paths (Oxborough, 2004; Baker, 2008) directly affects photosynthetic electron  
135 transport rates and formation of assimilation force (i.e. NADPH and ATP). Furthermore, light  
136 energy absorption, quantum state change, exciton resonant transfer among antenna pigment  
137 molecules and fluorescence emission in primary reaction are determined by intrinsic  
138 characteristics of the antenna pigment molecules (Govindjee, 2002; Baker, 2008; Richter *et al.*,  
139 2008 Panitchayangkoon *et al.*, 2010; Sarovar *et al.*, 2010). However, quantifying the nature of  
140 processes from light absorption to water splitting is still extremely limited but remains a key goal  
141 to improve models for predicting values of  $\Phi_{\text{PSII}}$  from only light absorption measurements (Renk  
142 *et al.*, 2000; Buckley & Farquhar, 2004).

143 As the research shows, methodologically,  $\Phi_{\text{PSII}}$  can be directly modelled by several empirical  
144 models (Laws *et al.*, 2002; Smyth *et al.*, 2004; Ritchie, 2008; Ritchie & Bunthawin, 2010; Silsbe &  
145 Kromkamp, 2012) and is considered as an equivalent to *ETR*. Although these models can fit well  
146 light-response curves of electron transport rate (*ETR-I*) and light-response curves of effective  
147 quantum efficiency of PS II ( $\Phi_{\text{PSII-I}}$ ) under normal conditions, models simulating *ETR-I* and  $\Phi_{\text{PSII-I}}$   
148 in plants under low light intensities in greenhouse or under a forest trees' canopy are yet to be  
149 developed. Modelling of these curves under such irradiance environmental conditions is necessary  
150 for the evaluation of the generality of the models. Moreover, no previous model neither explains  
151 the reasons why  $\Phi_{\text{PSII}}$  decreased nonlinearly with increasing irradiance (Robakowski, 2005;  
152 Pavlovič *et al.*, 2011; van der Tol *et al.*, 2014), nor helps to understand the way intrinsic  
153 characteristics of light-harvesting pigment molecules affect  $\Phi_{\text{PSII}}$  and determine light harvesting,  
154 light energy conversion as well as subsequent productivity (*ETR*) through PS II.

155 In the present study, we hypothesized that: (1)  $\Phi_{\text{PSII}}$  should be closely related to the intrinsic

156 properties of light-harvesting pigment molecules, closure and opening of PS II and photosynthetic  
157 enzyme kinetics of plants, (2)  $\Phi_{\text{PSII}}$  depends on the competition of three paths of de-excitation, thus  
158 if more excitation energy is distributed to photochemistry, and less to heat dissipation, or  
159 chlorophyll fluorescence emission,  $\Phi_{\text{PSII}}$  will be higher, and (3) behavior of the effective light  
160 absorption cross-section of light-harvesting pigment molecules will determine changes of  $\Phi_{\text{PSII}}$ .

161 In this study, we firstly developed a model of the relationship between  $\Phi_{\text{PSII}}$  and  $I$  based on  
162 fundamental properties of light absorption and transfer of energy to the reaction centers via  
163 photosynthetic pigment molecules (see Ye *et al.* 2013a, 2013b). Firstly, here we adopt a novel  
164 approach to determine the interdependence between the properties of photosynthetic pigments and  
165  $\Phi_{\text{PSII}}$  of plants under different light conditions. Secondly, we present the development of this  
166 model as applied to mung bean (*Vigna radiata* L.) under different light environments, and  
167 compare the fitted results with two empirical models which were introduced by Webb *et al.*,  
168 (1974), Ritchie, (2008), and Smyth *et al.*, (2004). Thirdly, we have evaluated these models for the  
169 relationship between  $\Phi_{\text{PSII}}$  and  $I$  through comparing the fitted values of  $PAR_{\text{sat}}$  and  $ETR_{\text{max}}$ .  
170 Finally, we have investigated the impact of the intrinsic characteristics of light-harvesting  
171 pigment molecules on  $\Phi_{\text{PSII}}$ .

172

## 173 MATERIALS AND METHODS

### 174 Study site and plants

175 At the end of June 2016, seeds of mung bean *Vigna radiata* [(L.) R. Wilczek] were soaked for  
176 3 h and sowed on potted trays which were filled with matrixes (Scotts Miracle-Gro) consisted of  
177 turfy earth, coconut tree branny, perlite and vermiculite and contained about  $2.4 \text{ g} \cdot \text{kg}^{-1}$  of total  
178 nitrogen,  $0.95 \text{ g} \cdot \text{kg}^{-1}$  of  $\text{P}_2\text{O}_5$ ,  $1.27 \text{ g} \cdot \text{kg}^{-1}$  of  $\text{K}_2\text{O}$  and about  $0.71 \text{ g} \cdot \text{kg}^{-1}$  of trace elements. Seeds  
179 were germinated at the air temperature of  $28 \text{ }^\circ\text{C}$ , the relative humidity of 80 % and light intensity  
180 of  $125 \text{ } \mu\text{mol photons m}^{-2} \cdot \text{s}^{-1}$  (12h-day) and grown to the height of 7~10 cm. A total of 44  
181 seedlings (healthy and uniform) were transplanted into  $100 \text{ mm} * 85 \text{ mm} * 95 \text{ mm}$  plastic pots,  
182 and divided randomly into four groups with 11  
183 plants per group. They were cultured in phytotron with the day temperature of  $25\sim 28^\circ\text{C}$  and the

184 night temperature of 20~24°C. Three light regimes were established: LL (low light with 100 μmol  
 185 photons m<sup>-2</sup> · s<sup>-1</sup>), ML (middle light with 220 μmol photons m<sup>-2</sup> · s<sup>-1</sup>), and HL (high light with 430  
 186 μmol photons m<sup>-2</sup> · s<sup>-1</sup>). Plants were watered every morning up to the full substrate capacity. After  
 187 20 days, 5 healthy plants were randomly selected from each light treatment to measure their  
 188 chlorophyll fluorescence parameters. When the plant height was about 20 cm, the third youngest  
 189 fully expanded leaf from the top to bottom was used for fluorescence measurements ( $n = 5$ ,  $n -$   
 190 number of replications).

### 191 Chlorophyll fluorescence measurements

192 Chlorophyll *a* fluorescence was measured on intact leaves using a chlorophyll fluorescence  
 193 measuring system (Dual PAM-100, Walz, Effeltrich, Germany) with DUAL-E and DUAL-DB  
 194 measuring heads. The initial level ( $F_0$ ) of fluorescence was detected after 25 min of dark adaptation.  
 195 The maximal fluorescence level ( $F_m$ ) of the dark- and light- ( $F_m'$ ) adapted leaves were determined  
 196 by applying saturating flashes (15.000 μmol photons m<sup>-2</sup> s<sup>-1</sup>) lasting 1 s, to promote the closure of  
 197 the PS II reaction centers, according to the method described by Maxwell & Johnson (2000). The  
 198 fluorescence parameters were calculated as described by van Kooten & Snel (1990) and  
 199 Klughammer & Schreiber (2008). Maximum quantum efficiency of PS II,  $F_v/F_m = (F_m - F_0)/F_m$ ;  
 200 non-photochemical quenching,  $NPQ = (F_m - F_m')/F_m'$ .  $ETR$  was obtained as  $ETR = \alpha' \times \beta' \times \Phi_{PSII} \times I$ ,  
 201 where  $\alpha'$  is distribution coefficient of absorption light energy by PS II and PSI to be assumed  
 202 typically 0.5 (Maxwell & Johnson, 2000; Major & Dunton, 2002; Evans, 2009), leaf absorptance ( $\beta$   
 203 ') is measured using an integrating sphere with a value typically returned of 0.86 (Ehleringer, 1981).  
 204 Leaves were incrementally exposed to 14 irradiance levels (range 0 to 1450 μmol photons m<sup>-2</sup> s<sup>-1</sup>)  
 205 at 30 s intervals.

### 207 Model 1

208 The photosynthetic electron transport rate via PS II can be described with Eq. 1 (Ye *et al.*  
 209 2013a, 2013b),

$$210 \quad ETR = \frac{\alpha' \beta' N_0 \sigma_{ik} \phi}{S} \times \frac{1 - \frac{(1 - g_i/g_k) \sigma_{ik} \tau}{\xi_3 + (\xi_1 k_p + \xi_2 k_D) \tau} I}{1 + \frac{(1 + g_i/g_k) \sigma_{ik} \tau}{\xi_3 + (\xi_1 k_p + \xi_2 k_D) \tau} I} \quad (1)$$

211 where  $\varphi$  is exciton-use efficiency in PS II,  $N_0$  is total photosynthetic pigment molecules of the  
 212 measured leaf,  $S$  is the leaf area ( $\text{m}^2$ ),  $g_i$  and  $g_k$  are the degeneration of energy levels of  
 213 photosynthetic pigments in the ground state ( $i$ ) and excited state ( $k$ ), respectively.  $k_P$  and  $k_D$  are  
 214 rates of the photochemical reaction and thermal deactivation, respectively.  $\zeta_1$ ,  $\zeta_2$  and  $\zeta_3$  are the  
 215 occupation probability of photochemistry, non-radiation heat dissipation, and fluorescence  
 216 emission, respectively.  $\sigma_{ik}$  is the eigen-absorption cross-section of photosynthetic pigments from  
 217 the ground state  $i$  to excited state  $k$  via light exposure,  $\tau$  is the average lifetime of the  
 218 photosynthetic pigments in the lowest excited state  $k$ .

219 According to Ye et al., (2013a, 2013b),  $\sigma_{ik}$ ,  $\tau$ ,  $\zeta_1$ ,  $\zeta_2$ ,  $\zeta_3$ ,  $g_i$ ,  $g_k$ ,  $k_P$  and  $k_D$  (Eq. 1) are inherently  
 220 specific but have different values depending on species and environmental conditions (e.g. light,  
 221 temperature,  $\text{CO}_2$  concentration and relative humidity). Therefore, for a given species and at given  
 222 environmental conditions, we can assume that  $\alpha_e = \frac{\alpha' \beta' N_0 \sigma_{ik} \varphi}{S}$  ( $\mu\text{mol electrons } (\mu\text{mol photons})^{-1}$ ) is

223 the initial slope of light-response curve of electron transport rate,  $\beta_e = \frac{(1 - g_i/g_k) \sigma_{ik} \tau}{\zeta_3 + (\zeta_1 k_P + \zeta_2 k_D) \tau}$  ( $\text{m}^2 \text{ s } (\mu\text{mol}$   
 224  $\text{photons})^{-1}$ ) is the dynamical down-regulation term of PS II, and  $\gamma_e = \frac{(1 + g_i/g_k) \sigma_{ik} \tau}{\zeta_3 + (\zeta_1 k_P + \zeta_2 k_D) \tau}$  ( $\text{m}^2 \text{ s } (\mu\text{mol}$   
 225  $\text{photons})^{-1}$ ) is the saturation term of photosynthesis. Eq. 1 can be simplified as,

$$226 \quad ETR = \alpha_e \frac{1 - \beta_e I}{1 + \gamma_e I}, \quad (2)$$

227  $PAR_{\text{sat}}$  is calculated from Eq. 3,

$$228 \quad PAR_{\text{sat}} = \frac{\sqrt{(\beta_e + \gamma_e)/\beta_e} - 1}{\gamma_e}, \quad (3)$$

229 Thus  $PAR_{\text{sat}}$  depends on  $\sigma_{ik}$ ,  $\tau$ ,  $k_D$ ,  $k_P$ ,  $g_i$ ,  $g_k$ ,  $\zeta_1$ ,  $\zeta_2$  and  $\zeta_3$ , but it is independent of  $N_0$ .

230 The maximum value for  $ETR$  ( $ETR_{\text{max}}$ ) =  $\alpha_e \frac{1 - \beta_e \cdot PAR_{\text{sat}}}{1 + \gamma_e \cdot PAR_{\text{sat}}} PAR_{\text{sat}}$ , and it can be simplified as,

$$231 \quad ETR_{\text{max}} = \alpha_e \left( \frac{\sqrt{\beta_e + \gamma_e} - \sqrt{\beta_e}}{\gamma_e} \right)^2, \quad (4)$$

232 Moreover, compared Eq. 1 with  $ETR = \alpha' \times \beta' \times \Phi_{\text{PSII}} \times I$  (Krall & Edward, 1992), the  
 233 relationship between  $\Phi_{\text{PSII}}$  and  $I$  is described by Eq. 5,



$$234 \quad \Phi_{\text{PSII}} = \frac{N_0 \sigma_{\text{ik}} \varphi}{S} \times \frac{1 - \frac{(1 - g_i/g_k) \sigma_{\text{ik}} \tau}{\xi_3 + (\xi_1 k_p + \xi_2 k_D) \tau} I}{1 + \frac{(1 + g_i/g_k) \sigma_{\text{ik}} \tau}{\xi_3 + (\xi_1 k_p + \xi_2 k_D) \tau} I}, \quad (5)$$

235 Eq. 5 demonstrates that  $\Phi_{\text{PSII}}$  is closely related with intrinsic characteristics of light-harvesting  
 236 pigment molecules, it does not only depend on  $I$ , but also on  $N_0$ ,  $\sigma_{\text{ik}}$ ,  $\tau$ ,  $\varphi$ ,  $k_p$ ,  $k_D$ ,  $g_i$ ,  $g_k$ ,  $\xi_1$ ,  $\xi_2$  and  $\xi_3$ .  
 237 In particular, Eq. 5 reveals that  $\Phi_{\text{PSII}}$  increases with increasing  $k_p$  or  $k_D$ , and decreases with  
 238 increasing  $\tau$ . In addition, Eq. 5 can be simplified as:

$$239 \quad \Phi_{\text{PSII}} = \frac{\alpha_c}{\alpha \beta} \frac{1 - \beta_c I}{1 + \gamma_c I}, \quad (6)$$

240 Eq. 6 shows clearly that  $\Phi_{\text{PSII}}$  decreases non-linearly with increasing  $I$  at given  
 241 environmental conditions (e.g. air temperature, CO<sub>2</sub> concentration and relative humidity).

242 In addition, the effective absorption cross-section of light-harvesting pigment molecules ( $\sigma'_{\text{ik}}$ )  
 243 can also be expressed as a function of  $I$  (Ye *et al.*, 2013a, 2013b). Namely,

$$244 \quad \sigma'_{\text{ik}} = \frac{\sigma_{\text{ik}}}{1 + \frac{(1 + g_i/g_k) \sigma_{\text{ik}} \tau I}{\xi_3 + (\xi_1 k_p + \xi_2 k_D) \tau}} \left[ 1 - \frac{(1 - g_i/g_k) \sigma_{\text{ik}} \tau I}{\xi_3 + (\xi_1 k_p + \xi_2 k_D) \tau} \right] \quad (7)$$

245 Eq. 7 shows that  $\sigma'_{\text{ik}}$  increases with  $k_p$ ,  $k_D$ ,  $\xi_1$ ,  $\xi_2$ ,  $\xi_3$  and  $1/\tau$  but decreases with  $I$ .  $\sigma'_{\text{ik}} = \sigma_{\text{ik}}$   
 246 when  $I = 0$ . As such, the light absorption cross-section is not a constant under any given  
 247 irradiance (excluding  $I = 0$ ).

248 Compared Eq. 5 with Eq. 7, the relationship between  $\Phi_{\text{PSII}}$  and  $\sigma'_{\text{ik}}$  is described by Eq. 8

$$249 \quad \Phi_{\text{PSII}} = \frac{\alpha_c}{\alpha \beta} \times \frac{\sigma'_{\text{ik}}}{\sigma_{\text{ik}}} \quad (8)$$

250 Under given environmental conditions, the values of  $\alpha_c$ ,  $\sigma_{\text{ik}}$ ,  $\alpha'$  and  $\beta'$  are the constants.  
 251 Therefore, Eq. 8 demonstrates that  $\Phi_{\text{PSII}}$  is directly proportional to  $\sigma'_{\text{ik}}$  and it changes as a function  
 252 of  $\sigma'_{\text{ik}}$ .

253

## 254 Model 2

255 Effective quantum efficiency of PSII ( $\Phi_{\text{PSII}}$ ) ranges from 0 to 1 (the maximum is not usually  
 256 higher than 0.85). It has been found experimentally that  $\Phi_{\text{PSII}}$  usually follows a simple

257 exponential decay function (Webb *et al.*, 1974; Ritchie, 2008 ; Ritchie *et al.*, 2010), namely,

$$258 \quad \Phi_{\text{PSII}} = \Phi_{\text{PSIImax}} \times e^{-k_w I} \quad (9)$$

259  $\Phi_{\text{PSIImax}}$  is the maximum effective quantum efficiency which means the effective quantum  
260 efficiency at theoretical zero irradiance,  $k_w$  is a scaling constant, and  $I$  is the irradiance. The  
261  $\Phi_{\text{PSIImax}}$  can be obtained by Eq. 9.

262 Substituting Eq. 9 into  $ETR = \alpha' \times \beta' \times \Phi_{\text{PSII}} \times I$  (Krall & Edward, 1992), we get the following  
263 expression for  $ETR$ :

$$264 \quad ETR = \alpha' \times \beta' \times I \times \Phi_{\text{PSIImax}} \times e^{-k_w I} \quad (10)$$

265 Using Eq. 10, we can calculate saturation irradiance ( $PAR_{\text{sat}} = 1/k_w$ ) and maximum electron  
266 transport rate ( $ETR_{\text{max}} = \alpha' \times \beta' \times PAR_{\text{sat}} \times \Phi_{\text{PSIImax}} e^{-1}$ ).

267 Here we take both Eqs. 9 and 10 as model 2.

### 268 **Model 3**

269 After Webb *et al.* (1974) introduced an exponential function, Smyth *et al.* (2004) and Silsbe  
270 & Kromkamp (2012) used this function to fit light-response curves of  $\Phi_{\text{PSII}}$  (Eq. 11).

$$271 \quad \Phi_{\text{PSII}} = \frac{F_v}{F_m} \times \frac{PAR_{\text{sat}}}{I} [1 - \exp(-I/PAR_{\text{sat}})], \quad (11)$$

272  $F_v/F_m$  is the 'dark-adapted' maximum operating efficiency of PS II and  $PAR_{\text{sat}}$  is the saturation  
273 irradiance (Smyth *et al.*, 2004). The  $F_v/F_m$  and  $PAR_{\text{sat}}$  can be obtained by Eq. 11.

274 Similarly, substituting Eq. 11 into  $ETR = \alpha' \times \beta' \times \Phi_{\text{PSII}} \times I$  (Krall & Edward, 1992), we get the  
275 following expression for  $ETR$ ,

$$276 \quad ETR = \alpha' \times \beta' \times \frac{F_v}{F_m} PAR_{\text{sat}} [1 - \exp(-I/PAR_{\text{sat}})], \quad (12)$$

277 The maximum  $ETR$  can be calculated by the following formula,

$$278 \quad ETR_{\text{max}} = \alpha' \times \beta' \times \frac{F_v}{F_m} PAR_{\text{sat}} [1 - \exp(-1)] \quad (13)$$

279 Similarly, here we take Eqs. 12 and 13 as model 3.

280

### 281 **Chlorophyll determination**

282 Leaf discs from control areas were rapidly frozen in liquid nitrogen and ground to powder.  
283 Then the chlorophyll (Chl) was extracted with 80% (v/v) acetone and quantified with

284 spectrophotometer (*UVICON-930*, Kontron Instruments, Zürich, Switzerland). Chl *a* was  
285 determined at wavelength 663 nm, Chl *b* at 646 nm and carotenoids at 470 nm (Lichtenthaler 1987).  
286 Total chlorophyll content was determined as described by Porra, Thompson & Kriedermann  
287 (1989).

288

## 289 **Statistical analysis**

290 All variables are expressed as mean values ( $\pm$ SE) from five samples for each species. Data  
291 were analyzed with one-way analysis of variance (ANOVA) and then the values of  $ETR_{\max}$  and  
292  $PAR_{\text{sat}}$  estimated by three models were compared using a paired-sample *t* test at  $\alpha < 0.05$  ( $\alpha$  -  
293 significance level) using the SPSS 18.0 statistical software (SPSS, Chicago, IL). In addition, to  
294 compare the advantages and disadvantages of the study models, we took the  
295 Akaike's information criterion (*AIC*) and determination coefficient ( $R^2$ ) as two indicators to  
296 assess the fitting results of the three models. *AIC* was calculated by reference to Akaike's method  
297 (1973), and  $R^2$  was given directly by SPSS12.5 after fitting the data.

298

## 299 **Results**

### 300 **Light-response curves of electron transport rate**

301 Representative *ETR-I* curves (fitting the model 1, 2 and 3) for mung bean under three light  
302 environments are given in Fig. 1. In LL, *ETR* initially increased (almost linearly) with *I* towards  
303 saturation and subsequently, beyond the saturation irradiances exhibited a fast decline, suggesting  
304 dynamic down-regulation of PS II or photoinhibition (Fig. 1a). Under ML and HL, beyond  $PAR_{\text{sat}}$ ,  
305 *ETR* values exhibited a little decline with increasing *I* (Fig. 1b and 1c). When the values of  $PAR_{\text{sat}}$   
306 were compared among all the light environments, they ranged from 150 to 417  $\mu\text{mol photons m}^{-2}$   
307  $\text{s}^{-1}$ .  $ETR_{\max}$  followed a similar trend as  $PAR_{\text{sat}}$  and the values of  $ETR_{\max}$  ranged from 7.36 to 26.04  
308  $\mu\text{mol electrons m}^{-2} \text{s}^{-1}$  given the little difference in initial slope of *J-I* curves ranging from 0.456  
309 to 0.586 (Table 2). Moreover, it should be noted that under LL  $ETR_{\max}$  ( $7.20 \pm 0.52 \mu\text{mol electrons}$   
310  $\text{m}^{-2} \text{s}^{-1}$ ),  $PAR_{\text{sat}}$  ( $149.56 \pm 8.81 \mu\text{mol photons m}^{-2} \text{s}^{-1}$ ) and the initial slope of *ETR-I* curve [ca. 0.456  
311  $\mu\text{mol electrons} (\mu\text{mol photons})^{-1}$ ] were lowest among three light environments. This result  
312 indicates that the capacity of light energy conversion of plants growing in LL is lower than in ML  
313 and in HL.

314 We used models 1, 2 and 3 to simulate light-response curves of electron transport rate of mung  
315 bean under three light environments. Fitted results showed that models 2 and 3 differed markedly  
316 from the measured data (Fig. 1). Under three light environments (LL, ML and HL), the coefficients  
317 of determination ( $R^2$ ) for model 1 were 0.914, 0.828 and 0.982; for model 2  $R^2$  is 0.712, 0.223 and  
318 0.592; for model 3  $R^2$  is 0.239, 0.792 and 0.955, respectively. Comparing the goodness of fit of the  
319 models, model 1, generally, had the best fit and showed greatest *AIC* values.

320 Under three light environments, the values of  $ETR_{\max}$  and  $PAR_{\text{sat}}$  estimated by model 1 were in  
321 agreement with the measured data, whereas model 2 overestimated  $ETR_{\max}$  and  $PAR_{\text{sat}}$ , and model 3  
322 greatly underestimated  $ETR_{\max}$  and  $PAR_{\text{sat}}$  (Table 1).  $ETR_{\max}$  and  $PAR_{\text{sat}}$ , which are estimated by  
323 models 1, 2 and 3,  $R^2$  and *AIC* derived from  $ETR-I$  curves (Fig. 1) are given in Table 1. Model 1  
324 simulated well  $ETR-I$  curves, while models 2 and 3 fitted poorly  $ETR-I$  curves (Fig.1).

325

### 326 **Light-response curves of $\Phi_{\text{PSII}}$**

327 Mung bean under three light environments exhibited a characteristic initial decrease of  $\Phi_{\text{PSII}}$   
328 with irradiance (Fig. 1). In LL, the decline of  $\Phi_{\text{PSII}}$  differed significantly from HL and decreased  
329 more abruptly compared with the other light environments (Fig. 2). It indicates that plants growing  
330 in LL had the lowest light energy use efficiency to drive the photochemistry. Moreover, the  
331 simulations of the relationship between  $\Phi_{\text{PSII}}$  and irradiance by model 1 are in perfect agreement  
332 with the experimental data ( $R^2 \geq 0.985$ ) (Fig. 2).

333 In addition, the values of  $PAR_{\text{sat}}$  calculated by Eqs. 3 were not significantly different at a given  
334 light intensity (Table 2).  $\Phi_{\text{PSII}}$  (and  $PAR_{\text{sat}}$ ) calculated by Eqs. 9 (and 10) showed significant  
335 differences in each light environment (Table 3). Furthermore,  $\Phi_{\text{PSII}}$  (and  $PAR_{\text{sat}}$ ) calculated by Eqs.  
336 11 and 12 differed significantly in each light environment (Table 4). For example,  $PAR_{\text{sat}}$  estimated  
337 by Eqs. 11 and 12 were 11.38 and 24.69  $\mu\text{mol photons m}^{-2} \text{s}^{-1}$  in LL, respectively. However, the  
338 measured value of  $PAR_{\text{sat}}$  was about 150  $\mu\text{mol photons m}^{-2} \text{s}^{-1}$ .

339

### 340 **Light-response curves of non-photochemical quenching (NPQ)**

341 Representative  $NPQ-I$  curves for mung bean under three light environments are given in Fig.  
342 3. Under LL and ML  $NPQ$  initially increased (almost linearly) with  $I$  and subsequently, at the  
343 middle irradiances (about 250  $\mu\text{mol photons m}^{-2} \text{s}^{-1}$ ),  $NPQ$  stabilized and then it increased with  $I$ .

344 In HL,  $NPQ$  increased fast when irradiances are beyond  $250 \mu\text{mol photons m}^{-2} \text{s}^{-1}$  (Fig.3c).  
345 According to Eqn. (1), plants growing in HL have higher  $ETR$  than in LL and ML.

346

### 347 **Light-response curves of effective light energy absorption cross-section**

348 The potential for light-harvesting pigments to absorb light energy is reflected by the value of  
349  $\sigma_{ik}$  which increases with the amount of light energy absorbed. For example, in LL, ML and in HL,

350  $\sigma_{ik}$  for mung bean calculated by  $\sigma_{ik} = \frac{S\alpha_e}{\alpha' \beta' \phi N_0}$  (where  $S$  is the measured leaf area,  $\alpha_e$  is the initial

351 slope of the light response of photosynthetic electron transport rate,  $\alpha'$  is the fraction of light

352 absorbed by photosystem II,  $\beta'$  is leaf absorptance,  $\phi$  is excitation efficiency of PS II, i.e. for

353 charge separation of P680) is  $(7.62 \pm 0.27) \times 10^{-21} \text{ m}^2$ ,  $(9.85 \pm 0.46) \times 10^{-21} \text{ m}^2$  and

354  $(11.65 \pm 0.68) \times 10^{-21} \text{ m}^2$ , respectively; these values are all significantly different from one another

355 ( $n = 5$ , one-way ANOVA followed by Tukey's test,  $\alpha < 0.05$ ). Eq. 7 shows that  $\sigma_{ik}'$  increases with

356  $k_p$  or  $k_D$ , but decreases (non-linearly) with increasing values of  $I$ , and/or  $\tau$ . Therefore, the

357 competition for each exciton amongst photochemistry, heat dissipation and fluorescence emission

358 directly affects the effective light energy absorption cross-section of light-harvesting pigments

359 ( $\sigma_{ik}'$ ) (Fig. 4). At a given irradiance in  $\sigma_{ik}'-I$  curves, the higher  $\sigma_{ik}'$  is, the more light energy it

360 absorbs. For example, in Fig. 4 at  $I = 600 \mu\text{mol photons m}^{-2} \text{s}^{-1}$   $\sigma_{ik}'$  is  $0.12 \times 10^{-21} \text{ m}^2$ ,  $0.26 \times 10^{-21}$

361  $\text{m}^2$  and  $0.36 \times 10^{-21} \text{ m}^2$  under LL, ML and HL. It indicated that under HL mung bean had a higher

362 ability to absorb light energy than under LL and ML.

### 363 **Discussion**

364 We have built a new model of the relationship between  $\Phi_{\text{PSII}}$  and  $I$  based on light absorption  
365 and energy transfer to the reaction centers via photosynthetic pigments. It includes all relevant  
366 processes involving light energy absorption and conversion and transfer to the reaction centers of  
367 PS II (Ye *et al.*, 2013a, 2013b).

368 The present study was focused on the relationships between  $\Phi_{\text{PSII}}$ ,  $ETR$ ,  $\sigma_{ik}$  and  $I$  in mung bean  
369 seedlings growing in one of three light environments. Our main results were the Eq. 1 and 2 used to

370 determine  $ETR$  in function of  $I$  and explain the interdependence between  $ETR$  and biophysical  
371 parameters, such as  $\sigma'_{ik}$ . What is most important, we found that the  $\Phi_{PSII}$  decrease is caused by the  
372 reduction of  $\sigma'_{ik}$  with increasing  $I$ . This finding is of fundamental importance to understand the  
373 molecular and biophysical mechanisms of variation in  $\Phi_{PSII}$  under the changing light environment.  
374 In our study  $\Phi_{PSII}$  not only depends on  $N_0$ ,  $\sigma_{ik}$  and  $\varphi$  when environmental factors (e.g. irradiance,  
375  $CO_2$  concentration and temperature) are constant, but it depends also on  $\tau$ ,  $k_P$ ,  $k_D$ ,  $g_i$ ,  $g_k$ ,  $\zeta_1$ ,  $\zeta_2$  and  $\zeta_3$ ,  
376 specially on  $\tau$ ,  $k_P$  and  $k_D$  which are closely associated with processes of light energy absorption,  
377 excitons production and excitation energy transfer to reaction centers. In Eq. 5  $\Phi_{PSII}$  increases with  
378  $k_P$  (Fig. 1) and  $k_D$  (Fig. 3) when they increase with light intensity, but  $\Phi_{PSII}$  decreases with  $\tau$ .

379 We used models 1, 2 and 3 to simulate  $ETR-I$  and  $\Phi_{PSII}-I$  curves of mung bean in three light  
380 environmental conditions. There was evidence that model 2 and model 3 did not satisfactorily fit  
381  $ETR-I$  and  $\Phi_{PSII}-I$  curves. Generally, the values of  $PAR_{sat}$  and  $ETR_{max}$  estimated by model 2 were  
382 higher than the measured values (Table 2), while the values of  $PAR_{sat}$  and  $ETR_{max}$  estimated by  
383 model 3 were lower than the measured values (Table 2). These results were similar to Laws *et al.*  
384 (2002), Smyth *et al.* (2004), Silsbe & Kromkamp (2012). The values of  $PAR_{sat}$  and  $ETR_{max}$   
385 estimated by model 1 were very close to the measured values (Table 2). Thus, we concluded that  
386 models 2 and 3 simulate poorly  $ETR-I$  and  $\Phi_{PSII}-I$  curves, especially under high level of actinic  
387 light inducing dynamic down-regulation of PS II.

388 Mathematical models are not only useful to reproduce and explain the observed plants behavior,  
389 but also to make predictions and attempt to answer more fundamental questions. For example,  
390 model 1 (Eq. 5) forecasts increases in  $\Phi_{PSII}$  with  $k_P$  and  $k_D$ , and decreases with increasing  $\tau$ . Our  
391 results confirm that  $\Phi_{PSII}$  increases with  $k_P$  and  $k_D$ . In HL  $k_P$  (reflected in  $ETR$ ) and  $k_D$  (reflected in  
392  $NPQ$ ) (Table 2 and Fig. 3) were higher compared with LL and ML. What is of great importance,  
393 based on Eq. 5 or 8, the reason that  $\Phi_{PSII}$  decreases with increasing  $I$  is the decrease in  $\sigma'_{ik}$ . In this  
394 study, in HL, mung bean shows the most abrupt decrease in  $\sigma'_{ik}$  compared with LL and ML (Fig. 4).

395 So far we have deliberately excluded that the environmental factors influence  $\Phi_{PSII}$  to focus  
396 on properties of photosynthetic pigments and PSII which may have a significant effect on  $\Phi_{PSII}$ .  
397 With the model presented here, it is straightforward to include equations representing  $ETR-I$  and

398  $\Phi_{\text{PSII}}-I$  which are associated with light energy absorption, excitons production and its transfer to  
399 photochemical reaction centers, which may answer why LL mung bean has the lowest  $\Phi_{\text{PSII}}$ ,  
400  $ETR_{\text{max}}$  and  $PAR_{\text{sat}}$  values, and also explain why its  $ETRs$  decline fastest compared with ML and  
401 HL plants. If the model of the relationship between  $\Phi_{\text{PSII}}$  and  $I$  is combined with Eq. 1 (Ye *et al.*  
402 2013a), much information on physical and biochemical parameters of photosynthetic pigments  
403 could be obtained. Additionally, the model of the relationship between  $\Phi_{\text{PSII}}$  and  $I$  indicates  $\Phi_{\text{PSII}}$   
404 to be proportional to the product of  $N_0$ ,  $\varphi$  and  $\sigma_{\text{ik}}$  besides  $\tau$ ,  $k_{\text{P}}$ ,  $k_{\text{D}}$ ,  $g_{\text{i}}$ ,  $g_{\text{k}}$ ,  $\zeta_1$ ,  $\zeta_2$  and  $\zeta_3$ . Therefore,  
405 plants with a higher product of  $N_0$ ,  $\varphi$  and  $\sigma_{\text{ik}}$  have a higher initial value of  $\Phi_{\text{PSII}}$ .

406 In conclusion, the proposed model provides the means to predict and simulate the  $\Phi_{\text{PSII}}-I$   
407 curves. The  $\Phi_{\text{PSII}}$  decrease with increasing  $I$  stems from the decrease in effective light energy  
408 absorption cross-section of photosynthetic pigments (see Ye *et al.*, 2013a, 2013b). When the  
409 presented model is combined with the mechanistic model of  $ETR-I$ , they could become an  
410 effective tool towards identifying novel mechanistic properties by which plants modify their light  
411 harvesting properties and show photoacclimation (Dubinsky & Stambler, 2009), photoprotection  
412 (Takahashi & Badger, 2011; Niyogi & Truong, 2013), dynamic down-regulation of PSII (Ralph &  
413 Gademann, 2005) or photoinhibition (Govdjee, 2002) in response to environmental stressors. A  
414 cutting-edge next step will be to investigate more species adapted to different environmental  
415 conditions along geographical gradients to distinguish between genetic and environmental factors  
416 effects on  $\Phi_{\text{PSII}}$ .

417

#### 418 **Acknowledgements**

419 This research was supported by the Natural Science Foundation of China (Grant No. 31560069)  
420 and the Natural Science Foundation of Jiangxi Province (Grant No. 20142BAB20402).

## References

- Baker NR.** 2008. Chlorophyll fluorescence: A probe of photosynthesis in vivo. *Annual of Review Plant Biology* **59**, 89–113.
- Buckley TN, Farquhar GD.** 2004. A new analytical model for whole-leaf potential electron transport rate. *Plant, Cell and Environment* **27**, 1487–1502.
- Córdoba J, Molina-Cano J-L, Martínez-Carrasco R, Morcuende R, Pérez P.** 2016. Functional and transcriptional characterization of a barley mutant with impaired photosynthesis. *Plant Science* **244**, 19–30.
- Dubinsky Z, Stambler N.** 2009. Photoacclimation processes in phytoplankton: mechanisms, consequences, and applications. *Aquatic Microbial Ecology* **56**, 163–176.
- Ehleringer JR.** 1981. Leaf absorptances of Mohave and Sonoran deserts plants. *Oecologia* **49**, 366–370.
- Evans JR.** 2009. Potential error in electron transport rates calculated from chlorophyll fluorescence as revealed by multilayer leaf model. *Plant and Cell Physiology* **50**, 698–706.
- Fryer MJ, Andrews JR, Oxborough K, Blowers DA, Baker NR.** 1998. Relationship between CO<sub>2</sub> assimilation, photosynthetic electron transport, and active O<sub>2</sub> metabolism in leaves of maize in the field during periods of low temperature. *Plant Physiology* **116**, 571–580.
- Genty B, Briantais JM, Baker NR.** 1989. The relationship between the quantum efficiency of photosynthetic electron transport and quenching of chlorophyll fluorescence. *Biochimica et Biophysica Acta* **990**, 87–92.
- Govindjee** 2002. A role for a light-harvesting antenna complex of photosystem II in photoprotection. *Plant Cell* **14**, 1663–1668.
- Kalaji HM, Jajoo A, Oukarroum A, Brestic M, Zivcak M, Samborska IA, Cetner MD, Łukasik I, Goltsev V, Ladle RJ.** 2016. Chlorophyll a fluorescence as a tool to monitor physiological status of plants under abiotic stress conditions. *Acta Physiologiae Plantarum* **38**, 102.
- Klughhammer C, Schreiber U.** 2008. Complementary PS II quantum yields calculated from simple fluorescence parameters measured by PAM fluorometry and the saturation pulse method. *PAM Application Notes* **1**, 11–14
- Krall JP, Edward GE.** 1992. Relationship between photosystem II activity and CO<sub>2</sub> fixation in leaves. *Physiologia Plantarum* **86**, 180–187.
- Krause GH, Weis E.** 1984. Chlorophyll fluorescence as a tool in plant physiology. II. Interpretation of fluorescence signals. *Photosynth Research* **5**, 139–157
- Laws E, Sakshaug E, Babin M, Dandonneau Y, Falkowski P, Geider R, Legendre L, Morel A, Sondergaard M, Takahashi M, Williams PJ.** 2002. Photosynthesis and primary productivity in marine ecosystems: Practical aspects and application of techniques. *JGOFS Report No.* 36.
- Lichtenthaler HK.** 1987. Chlorophyll and carotenoids - pigments of photosynthetic biomembranes. *Method in Enzymology* **148**, 350–382.
- Majláth I, Darko E, Palla B, Nagy Z, Janda T, Szalai G.** 2016. Reduced light and moderate water deficiency sustain nitrogen assimilation and sucrose degradation at low temperature in durum wheat. *Journal of Plant Physiology* **191**, 149–158.
- Major KM, Dunton KH.** 2002. Variations in light-harvesting characteristics of the seagrass, *Thalassia testudinum*: evidence for photoacclimation. *Journal of Experimental Marine Biology and Ecology* **275**, 173–189.
- Maxwell K, Johnson NG.** 2000. Chlorophyll fluorescence—a practical guide. *Journal of Experimental Botany* **51**,



659–668.

- Moin M, Bakshi A, Saha A, Kumar MU, Reddy AR, Rao KV, Siddiq EA, Kirt PB.** 2016. Activation tagging in Indica rice identifies ribosomal proteins as potential targets for manipulation of water-use efficiency and abiotic stress tolerance in plants. *Plant, Cell and Environment* **39**, 2440–2459.
- Niyogi KK and Truong TB.** 2013. Evolution of flexible non-photochemical quenching mechanisms that regulate light harvesting in oxygenic photosynthesis. *Current Opinion in Plant Biology* **16**, 307–314.
- Oxborough K.** 2004. Imaging of chlorophyll a fluorescence: theoretical and practical aspects of an emerging technique for the monitoring of photosynthetic performance. *Journal of Experimental Botany* **55**, 1195–1205.
- Panitchayangkoon G, Hayes D, Fransted KA, Caram JR, Harel E, Wen J, Blankenship RE, Engel GS.** 2010. Long-lived quantum coherence in photosynthetic complexes at physiological temperature. *Proceedings of National Academy of Sciences of the United States of America* **107**, 12766–12770.
- Pavlovič A, Slováková L, Pandolfi C, Mancuso S.** 2011. On the mechanism underlying photosynthetic limitation upon trigger hair irritation in the carnivorous plant venus flytrap (*Dionaea muscipula* Ellis). *Journal of Experimental Botany* **62**, 1991–2000.
- Porra RJ, Thompson WA, Kriedermann PE.** 1989. Determination of accurate extinction coefficient and simultaneous equations for assaying chlorophylls a and b extracted with four different solutions: verification of the concentration of chlorophyll standards by atomic absorption spectroscopy. *Biochimica et Biophysica Acta* **975**, 384–394.
- Ralph PJ, Gademann R.** 2005. Rapid light curves: A powerful tool assess photosynthetic activity. *Aquatic Botany* **82**, 222–237.
- Rascher U, Liebig M, Lüttge U.** 2000. Evaluation of instant light-response curves of chlorophyll fluorescence parameters obtained with a portable chlorophyll fluorometer on site in the field. *Plant, Cell and Environment* **23**, 1397–1405.
- Renk H, Ochocki S, Kurzyk S.** 2000. *In situ* and *simulated in situ* primary production in the Gulf of Gdańsk. *Oceanologia* **42**, 263–282.
- Richter M, Renger T, Knorr A.** 2008. A Block equation approach to intensity dependent optical spectra of light harvesting complex II. *Photosynthesis Research* **95**, 119–127.
- Ritchie RJ.** 2008. Fitting light saturation curves measured using modulated fluorometry. *Photosynthesis Research* **96**, 201–215.
- Ritchie RJ, Bunthawin S.** 2010. The use of pulse amplitude modulation (PAM) fluorometry to measure photosynthesis in a cam orchid, *Dendrobium* spp. (D. cv. *Viravuth pink*). *International Journal of Plant Science* **171**, 575–585.
- Robakowski P.** 2005. Susceptibility to low-temperature photoinhibition in three conifers differing in successional status. *Tree Physiology* **25**, 1151–1160.
- Sarovar M, Ishizaki A, Fleming GR, Whaley KB.** 2010. Quantum entanglement in photosynthetic light-harvesting complexes. *Nature Physics* **6**, 462–467.
- Silsbe GM, Kromkamp JC.** 2012. Modeling the irradiance dependency of the quantum efficiency of photosynthesis. *Limnology and Oceanography: Methods* **10**, 645–652.
- Smyth TJ, Pemberton KL, Aiken J, Geider RJ.** 2004. A methodology to determine primary production and

- phytoplankton photosynthetic parameters from Fast Repetition Rate Fluorometry. *Journal of Plankton Research* **26**, 1337–1350.
- Suggett DJ, Prasil O, Borowitzka MA.** 2010. Chlorophyll *a* fluorescence in aquatic sciences: methods and applications (developments in applied phycology). Springer, London, pp 323.
- Takahashi S, Badger MR.** 2011. Photoprotection in plants: a new light on photosystem II damage. *Trends in Plant Science* **16**, 53–59.
- van der Tol C, Berry JA, Campbell PKE, Rascher U.** 2014. Models of fluorescence and photosynthesis for interpreting measurements of solar-induced chlorophyll fluorescence, *Journal of Geophysical Research: Biogeosciences* **119**, 2312–2327.
- van Kooten O, Snel JFH.** 1990. The use of chlorophyll fluorescence nomenclature in plant stress physiology. *Photosynthesis Research* **25**, 147–150.
- Ye ZP, Robakowski P, Suggett DJ.** 2013a. A mechanistic model for the light response of photosynthetic electron transport rate based on light harvesting properties of photosynthetic pigment molecules. *Planta* **237**, 837–847.
- Ye ZP, Suggett DJ, Robakowski P, Kang HJ.** 2013b. A mechanistic model for the photosynthesis-light response based on the photosynthetic electron transport of PSII in C<sub>3</sub> and C<sub>4</sub> species. *New Phytologist* **199**, 110–120.

## Tables

Table 1. Measured data and results fitted by three models for *ETR-I* curves of mung bean under three light environments.  $ETR_{max}$  and  $PAR_{sat}$  estimated by three models were compared using a paired-sample *t* test at  $\alpha < 0.05$  ( $\alpha$  - significance level); the values followed by the different superscript letters are significantly different among three models in each light environment. All values indicate the mean  $\pm$ SE ( $n = 5$ ) except measured data.

| Photosynthetic parameters                                     | 100 $\mu\text{mol photons m}^{-2}\text{s}^{-1}$ |                         |                       |                | 200 $\mu\text{mol photons m}^{-2}\text{s}^{-1}$ |                         |                       |                 | 340 $\mu\text{mol photons m}^{-2}\text{s}^{-1}$ |                         |                       |                 |
|---------------------------------------------------------------|-------------------------------------------------|-------------------------|-----------------------|----------------|-------------------------------------------------|-------------------------|-----------------------|-----------------|-------------------------------------------------|-------------------------|-----------------------|-----------------|
|                                                               | Model 1                                         | Model 2                 | Model 3               | Measured data  | Model 1                                         | Model 2                 | Model 3               | Measured data   | Model 1                                         | Model 2                 | Model 3               | Measured data   |
| $PAR_{sat}$ ( $\mu\text{mol photons m}^{-2}\text{s}^{-1}$ )   | 149.56<br>$\pm 8.81^b$                          | 191.86<br>$\pm 13.26^a$ | 11.38<br>$\pm 1.13^c$ | $\approx 150$  | 249.98<br>$\pm 12.56^b$                         | 304.62<br>$\pm 10.05^a$ | 21.11<br>$\pm 1.04^c$ | $\approx 250$   | 447.01<br>$\pm 20.80^b$                         | 470.89<br>$\pm 11.72^a$ | 52.88<br>$\pm 1.10^b$ | $\approx 437$   |
| $ETR_{max}$ ( $\mu\text{mol electrons m}^{-2}\text{s}^{-1}$ ) | 7.20<br>$\pm 0.52^b$                            | 9.37<br>$\pm 0.70^a$    | 3.02<br>$\pm 0.30^c$  | $\approx 7.36$ | 9.90<br>$\pm 0.32^b$                            | 13.53<br>$\pm 0.41^a$   | 5.60<br>$\pm 0.28^c$  | $\approx 10.25$ | 26.07<br>$\pm 1.17^b$                           | 32.89<br>$\pm 1.36^a$   | 13.84<br>$\pm 0.26^c$ | $\approx 26.04$ |
| $R^2$                                                         | 0.914<br>$\pm 0.009$                            | 0.712<br>$\pm 0.008$    | 0.239<br>$\pm 0.005$  | -              | 0.948<br>$\pm 0.004$                            | 0.223<br>$\pm 0.009$    | 0.792<br>$\pm 0.002$  | -               | 0.982<br>$\pm 0.005$                            | 0.592<br>$\pm 0.024$    | 0.955<br>$\pm 0.004$  | -               |
| <i>AIC</i>                                                    | -18.51                                          | -20.23                  | -13.17                |                | -9.92                                           | -0.15                   | -33.73                |                 | 16.70                                           | 17.34                   | -19.10                |                 |

Table 2 Measured data and results fitted by model 1 for  $ETR-I$  and  $\Phi_{PSII-I}$  of mung bean under three light environments. The values of  $ETR_{max}$  and  $PAR_{sat}$  estimated by model 1 were compared using a paired-sample  $t$  test at  $\alpha < 0.05$  ( $\alpha$  - significance level); the values followed by the different superscript letters are significantly different in each light environment. All values indicate the mean  $\pm$  SE ( $n = 5$ ) except measured data.

| Photosynthetic parameters | 100 $\mu\text{mol photons m}^{-2} \text{s}^{-1}$ |                        |                | 200 $\mu\text{mol photons m}^{-2} \text{s}^{-1}$ |                         |                 | 340 $\mu\text{mol photons m}^{-2} \text{s}^{-1}$ |                         |                 |
|---------------------------|--------------------------------------------------|------------------------|----------------|--------------------------------------------------|-------------------------|-----------------|--------------------------------------------------|-------------------------|-----------------|
|                           | Model 1                                          |                        | Measured data  | Model 1                                          |                         | Measured data   | Model 1                                          |                         | Measured data   |
| $\Phi_{PSII_{max}}$       | 0.742<br>$\pm 0.016$                             | -                      | -              | 0.772<br>$\pm 0.012$                             | -                       | -               | 0.756<br>$\pm 0.019$                             | -                       | -               |
| $PAR_{sat}$               | 161.19<br>$\pm 12.75^a$                          | 149.56<br>$\pm 8.82^a$ | $\approx 150$  | 285.06<br>$\pm 8.62^a$                           | 249.98<br>$\pm 12.56^a$ | $\approx 250$   | 396.36<br>$\pm 6.90^a$                           | 447.01<br>$\pm 20.80^a$ | $\approx 437$   |
| $ETR_{max}$               | -                                                | 7.20<br>$\pm 0.52$     | $\approx 7.36$ | -                                                | 9.90<br>$\pm 0.32$      | $\approx 10.25$ | -                                                | 26.07<br>$\pm 1.17$     | $\approx 26.04$ |
| $R^2$                     | 0.998<br>$\pm 0.005$                             | 0.914<br>$\pm 0.009$   | -              | 0.996<br>$\pm 0.004$                             | 0.948<br>$\pm 0.004$    | -               | 0.985<br>$\pm 0.013$                             | 0.954<br>$\pm 0.005$    | -               |

Table 3 Measured data and results fitted by model 2 for  $ETR-I$  and  $\Phi_{PSII-I}$  of mung bean under three light environments.  $ETR_{max}$ ,  $PAR_{sat}$  and  $\Phi_{PSII_{max}}$  estimated by model 2 were compared using a paired-sample  $t$  test at  $\alpha < 0.05$  ( $\alpha$  - significance level); the values followed by the different superscript letters are significantly different in each light environment. All values indicate the mean  $\pm$ SE ( $n = 5$ ) except measured data.

| Photosynthetic parameters | 100 $\mu\text{mol photons m}^{-2} \text{s}^{-1}$ |                         |               | 200 $\mu\text{mol photons m}^{-2} \text{s}^{-1}$ |                         |                 | 340 $\mu\text{mol photons m}^{-2} \text{s}^{-1}$ |                         |               |
|---------------------------|--------------------------------------------------|-------------------------|---------------|--------------------------------------------------|-------------------------|-----------------|--------------------------------------------------|-------------------------|---------------|
|                           | Model 2                                          |                         | Measured data | Model 2                                          |                         | Measured data   | Model 2                                          |                         | Measured data |
| $\Phi_{PSII_{max}}$       | $\Phi_{PSII-I}$                                  | $ETR-I$                 | -             | $\Phi_{PSII-I}$                                  | $ETR-I$                 | -               | $\Phi_{PSII-I}$                                  | $ETR-I$                 | -             |
|                           | 0.703<br>$\pm 0.015^a$                           | 0.316<br>$\pm 0.012^b$  | -             | 0.759<br>$\pm 0.004^a$                           | 0.288<br>$\pm 0.010^b$  | -               | 0.758<br>$\pm 0.006^a$                           | 0.454<br>$\pm 0.026^b$  | -             |
| $PAR_{sat}$               | 65.08<br>$\pm 10.05^b$                           | 191.86<br>$\pm 13.26^a$ | $\approx 150$ | 147.64<br>$\pm 5.47^b$                           | 304.62<br>$\pm 10.05^a$ | $\approx 250$   | 238.28<br>$\pm 12.91^b$                          | 470.89<br>$\pm 11.72^a$ | $\approx 437$ |
|                           | -                                                | 9.37<br>$\pm 0.70$      | $\approx 7.2$ | -                                                | 13.53<br>$\pm 0.41$     | $\approx 10.25$ | -                                                | 32.89<br>$\pm 1.36$     | 26.04         |
| $R^2$                     | 0.983<br>$\pm 0.011$                             | 0.776<br>$\pm 0.054$    | -             | 0.989<br>$\pm 0.005$                             | 0.226<br>$\pm 0.051$    | -               | 0.991<br>$\pm 0.003$                             | 0.652<br>$\pm 0.025$    | -             |

Table 4 Measured data and results fitted by model 3 for  $ETR-I$  and  $\Phi_{PSII-I}$  curves of mung bean under three light environments.  $ETR_{max}$  and  $PAR_{sat}$  estimated by model 3 were compared using a paired-sample  $t$  test at  $\alpha < 0.05$  ( $\alpha$  - significance level); the values followed by the superscript letters are significantly different in each light environment. All values indicate the mean $\pm$ SE ( $n = 5$ ) except measured data.

| Photosynthetic parameters | 100 $\mu\text{mol photons m}^{-2} \text{s}^{-1}$ |                       |               | 200 $\mu\text{mol photons m}^{-2} \text{s}^{-1}$ |                       |                 | 340 $\mu\text{mol photons m}^{-2} \text{s}^{-1}$ |                        |                 |
|---------------------------|--------------------------------------------------|-----------------------|---------------|--------------------------------------------------|-----------------------|-----------------|--------------------------------------------------|------------------------|-----------------|
|                           | Model 3                                          |                       | Measured data | Model 3                                          |                       | Measured data   | Model 3                                          |                        | Measured data   |
|                           | $ETR-I$                                          | $\Phi_{PSII-I}$       |               | $ETR-I$                                          | $\Phi_{PSII-I}$       |                 | $ETR-I$                                          | $\Phi_{PSII-I}$        |                 |
| $\Phi_{PSIImax}$          | -                                                | -                     | -             | -                                                | -                     | -               | -                                                | -                      | -               |
| $PAR_{sat}$               | 11.38<br>$\pm 1.13^b$                            | 24.69<br>$\pm 1.41^a$ | $\approx 150$ | 21.11<br>$\pm 1.04^b$                            | 52.61<br>$\pm 1.84^a$ | $\approx 250$   | 52.88<br>$\pm 1.10^b$                            | 103.01<br>$\pm 4.49^a$ | $\approx 417$   |
| $ETR_{max}$               | 3.02<br>$\pm 0.030$                              | -                     | $\approx 7.2$ | 5.60<br>$\pm 0.28$                               | -                     | $\approx 10.25$ | 13.84<br>$\pm 0.26$                              | -                      | $\approx 26.04$ |
| $R^2$                     | 0.301<br>$\pm 0.048$                             | 0.995<br>$\pm 0.008$  | -             | 0.795<br>$\pm 0.025$                             | 0.996<br>$\pm 0.003$  | -               | 0.959<br>$\pm 0.006$                             | 0.984<br>$\pm 0.016$   | -               |

## Captions of figures

Figure 1. Light-response curves of electron transport rate of mung bean under three light environments (a, LL - 100, b, ML - 200 and c, HL - 340  $\mu\text{mol photons m}^{-2} \text{s}^{-1}$ ) and the curves simulated by models 1, 2 and 3 .

Figure 2. Light-response curves of effective quantum efficiency ( $\Phi_{\text{PSII}}$ ) of mung bean under three light environments (a, LL - 100, b, ML - 200 and c, HL - 340  $\mu\text{mol photons m}^{-2} \text{s}^{-1}$ ) and the curves simulated by models 1, 2 and 3.

Figure 3. Light-response curves of non-photochemical quenching ( $NPQ-I$ ) of mung bean under three light environments (a, LL - 100, b, ML - 200 and c, HL - 340  $\mu\text{mol photons m}^{-2} \text{s}^{-1}$ ).

Figure 4. Light-response curves of effective light energy absorption cross-section ( $\sigma'_{ik} -I$ ) of mung bean under three light environments (a, LL - 100, b, ML - 200 and c, HL - 340  $\mu\text{mol photons m}^{-2} \text{s}^{-1}$ ).

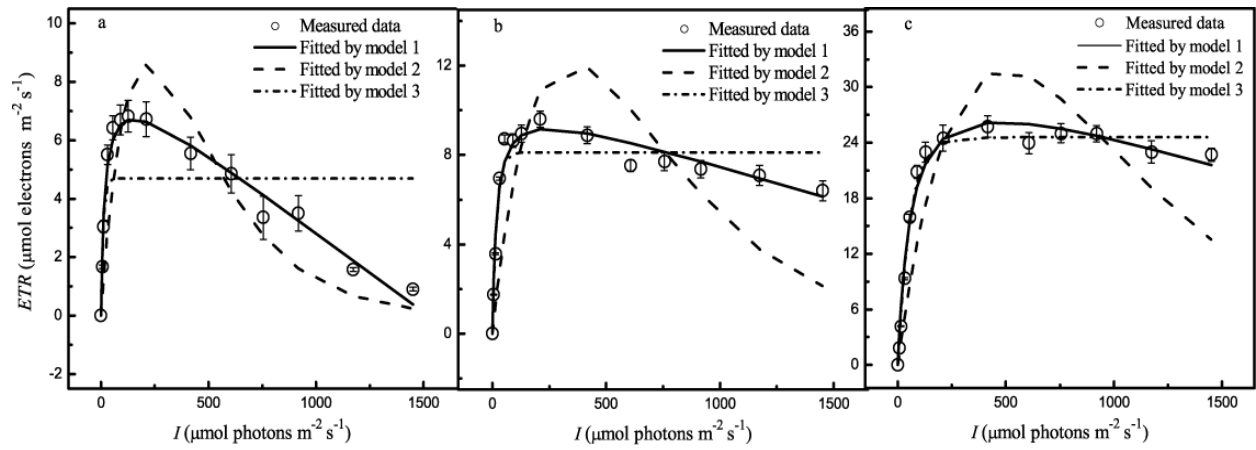

Figure 1



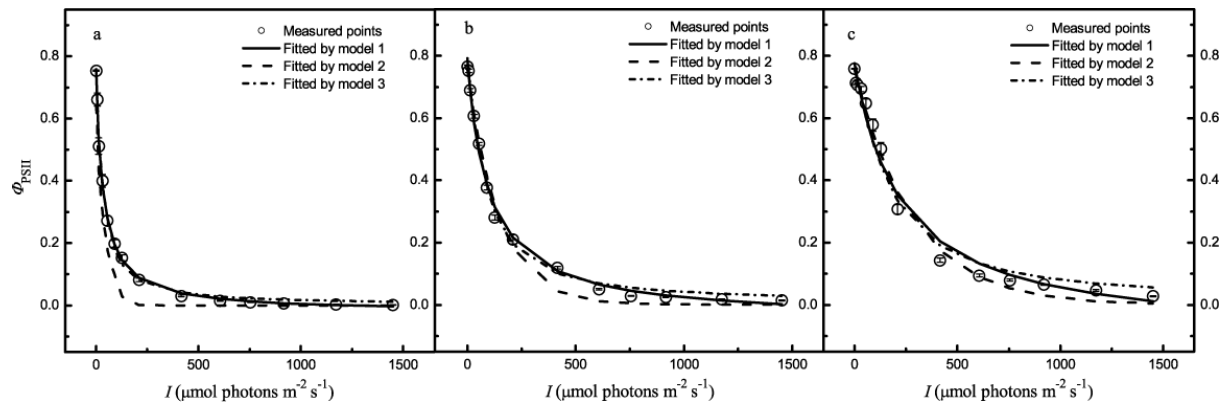

Figure 2

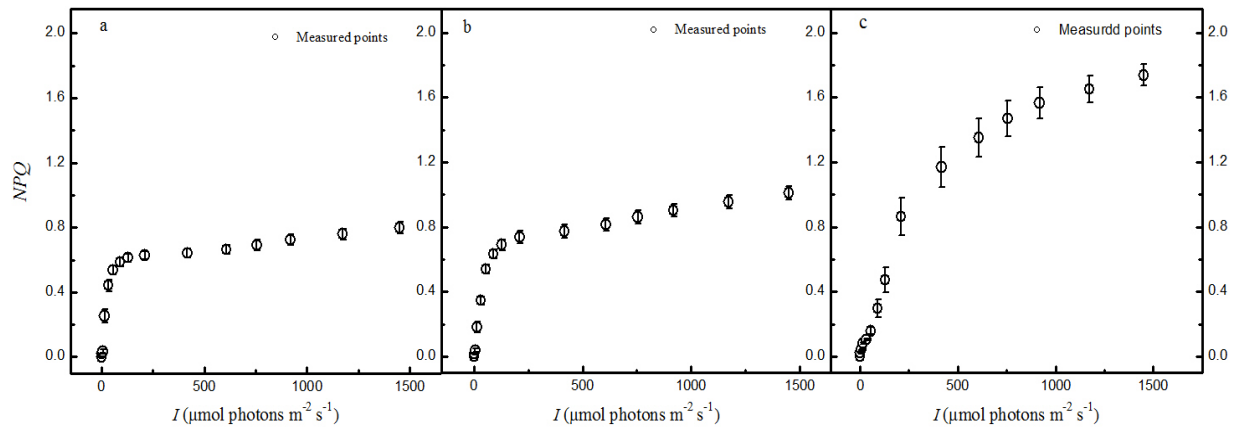

Figure 3

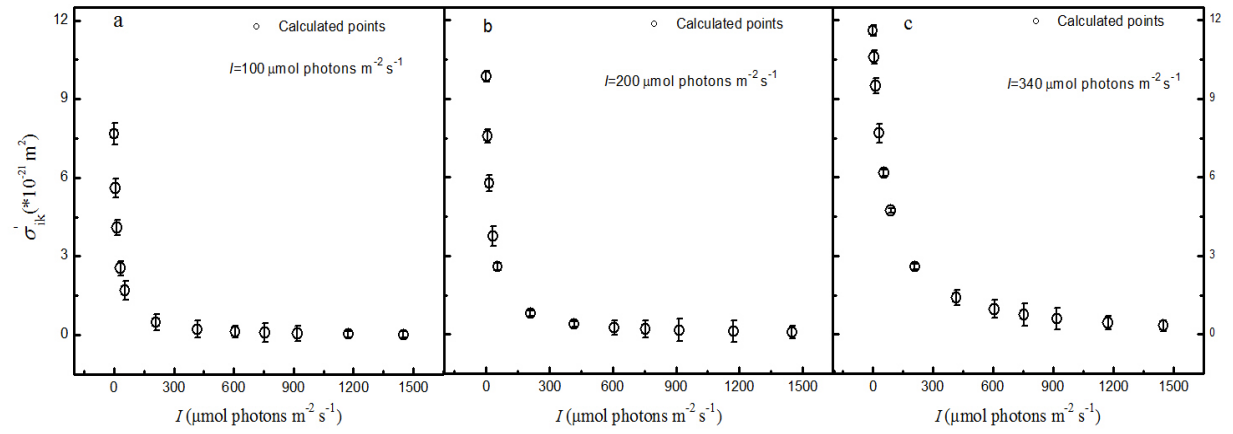

Figure 4
